# Fisheries data management systems in the NW Mediterranean: from data collection to web visualization

Jordi Ribera-Altimir <sup>1,2,\*</sup>, Gerard Llorach-Tó <sup>1,2,3</sup>, Joan Sala-Coromina <sup>1,2</sup>,  
Joan B. Company <sup>1,2</sup> and Eve Galimany <sup>1,2</sup>

<sup>1</sup>Institut de Ciències del Mar (ICM-CSIC), Passeig Marítim de la Barceloneta 37-49, 08003 Barcelona, Catalonia, Spain

<sup>2</sup>Institut Català de Recerca per a la Governança del Mar (ICATMAR), Passeig Marítim de la Barceloneta 37-49, 08003 Barcelona, Catalonia, Spain

<sup>3</sup>Xarxa Marítima de Catalunya (BlueNetCat), Plaça d'Eusebi Güell 6, 08034 Barcelona, Catalonia, Spain

\*Corresponding author: Email: [jribera@icm.csic.es](mailto:jribera@icm.csic.es)

†These authors contributed equally to this work.

Citation details: Ribera-Altimir, J., Llorach-Tó, G., Sala-Coromina, J. *et al.* Fisheries data management systems in the NW Mediterranean: from data collection to web visualization. *Database* (2023) Vol. 2023: article ID baad067; DOI: <https://doi.org/10.1093/database/baad067>

## Abstract

The European Union Data Collection Framework (DCF) states that scientific data-driven assessments are essential to achieve sustainable fisheries. To respond to the DCF call, this study introduces the information systems developed and used by *Institut Català de Recerca per a la Governança del Mar* (ICATMAR), the Catalan Institute of Research for the Governance of the Seas. The information systems include data from a biological monitoring, curation, processing, analysis, publication and web visualization for bottom trawl fisheries. Over the 4 years of collected data (2019–2022), the sampling program developed a dataset of over 1.1 million sampled individuals accounting for 24.6 tons of catch. The sampling data are ingested into a database through a data input website ensuring data management control and quality. The standardized metrics are automatically calculated and the data are published in the web visualizer, combined with fishing landings and Vessel Monitoring System (VMS) records. As the combination of remote sensing data with fisheries monitoring offers new approaches for ecosystem assessment, the collected fisheries data are also visualized in combination with georeferenced seabed habitats from the European Marine Observation and Data Network (EMODnet), climate and sea conditions from Copernicus Monitoring Environment Marine Service (CMEMS) on the web browser. Three public web-based products have been developed in the visualizer: geolocated bottom trawl samplings, biomass distribution per port or season and length-frequency charts per species. These information systems aim to fulfil the gaps in the scientific community, administration and civil society to access high-quality data for fisheries management, following the Findable, Accessible, Interoperable, Reusable (FAIR) principles, enabling scientific knowledge transfer.

**Database URL:** <https://icatmar.github.io/VISAP/www.icatmar.cat>

## Introduction

Global fishing stocks have been declining in the last decades because of both overfishing and an increasing demand for fish, which has led to the loss of catches since the 1950s (1). Aquaculture has been proposed to compensate for the lack of fish and increase marine resources to feed the human population. However, aquaculture itself will not be able to overcome the problem of marine food scarcity because it requires great amounts of wild-caught fish as feed (2). Instead, stocks that are scientifically assessed tend to increase in abundance with numbers trending towards proposed target levels (3). Therefore, there is a need to develop effective fisheries management strategies to sustain fisheries and the socio-economics involved.

The European Union Data Collection Framework (DCF) established for member states the obligation to collect, manage and annually report biological, environmental and socio-economic fisheries data as a source to provide scientific advice for management purposes (EU 2017/1004). In the

Mediterranean, fisheries data collection is carried out through both fisheries-dependent data (monitoring of commercial fisheries on board of fishing vessels and in auction), and fisheries-independent data (annual scientific trawl samplings for demersal species and acoustic surveys for small pelagic species). Other initiatives, apart from the official monitoring efforts from the DCF, also collect fisheries data. For example, the *Institut Français de Recherche pour l'Exploitation de la Mer*, the national institute for ocean science in France, implemented a Fisheries Information System (FIS) aiming to monitor their fisheries with scientific goals (4). In the USA, fisheries monitoring programs vary according to geography, objectives, practices, technology, institutional structures and funding (5). This specificity is important and adds value to the data obtained to better implement science-based management strategies. This was the main idea behind the creation of the *Institut Català de Recerca per a la Governança del Mar* (ICATMAR), a research institute devoted to obtain oceanographic data and implement marine monitoring programs with the goal to support marine

Received 26 May 2023; Revised 1 August 2023; Accepted 29 September 2023

© The Author(s) 2023. Published by Oxford University Press.

This is an Open Access article distributed under the terms of the Creative Commons Attribution License (<https://creativecommons.org/licenses/by/4.0/>), which permits unrestricted reuse, distribution, and reproduction in any medium, provided the original work is properly cited.

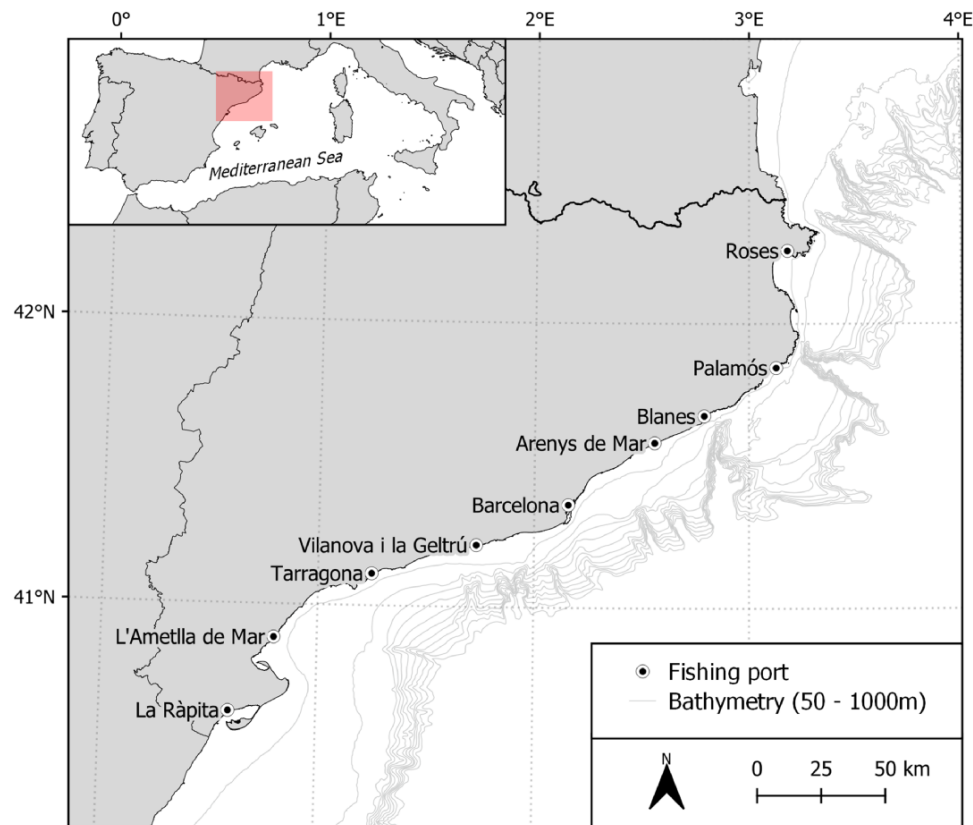

**Figure 1.** Map showing the study area along the Catalan coast (NW Mediterranean Sea), where the bottom trawling samplings take place. Sampling fishing ports are displayed on the map.

governance and management in the blue economy field. ICATMAR is an organization embedded within the Institut de Ciències del Mar (ICM-CSIC) and the Generalitat de Catalunya, the autonomous government of Catalonia (NE Spain). Since 2019, ICATMAR has developed and implemented a fisheries' monitoring program targeting the main commercial species of the Catalan coast using three fishing modalities (bottom trawling, purse seine and small-scale fisheries).

Traditionally, fisheries monitoring data are collected in written logs, analyzed and used to generate reports. However, new emerging technologies and advanced data systems 'have the potential to contribute to fishery-dependent data systems by expanding or streamlining data collection, automating and empowering the data processing and analysis and facilitating the communication of the results to relevant stakeholders (6). Even though data collection is typically funded by government organizations and public institutions, the majority of fisheries monitoring programs do not provide access to the data through open portals, and the data are often private or not easily accessible. For example, despite that the tracks of the fishing vessels (Vessel Monitoring System, VMS) are used for control purposes, both VMS and fishing landings can be valuable data for research. However, these data are not easily available or accessible because the corresponding institutions need a formal request in order to obtain the data. The reality of the scientific data is, then, opposed to the FAIR (Findable, Accessible, Interoperable, Reusable) principles (7). Effective data management is essential to all potential stakeholders that may use fisheries information. The FAIR principles stress the need to use automated machines to find data and allow

their use by a varied group of stakeholders including industry, academia, agencies and scientists (7).

In this work, we present the process of collecting, ingesting, organizing and visualizing the data of the bottom trawl fisheries' monitoring program from ICATMAR. The data system and visualization aim to easily provide data to different fishing sectors including fishing guilds and administration, the scientific community and the public in general. Data visualization is accessible to all stakeholders through an open website, based on FAIR principles, for the transfer of scientific knowledge, dissemination and education. Bathymetry, seabed habitats and climate and sea conditions are added to the visualization, as they are important factors that influence the catch composition (8–10).

## Materials and methods

### Study area

The Catalan coast (NW Mediterranean) is the study area where the data are collected (Figure 1), covering the depths where bottom trawling fishing is permitted. These depths range between 50 and 1000 m with the exception that the minimum depth may be exchanged for a minimum distance of 3 nautical miles from the coast in shallow areas, where the 50 m depth are reached at a farther distance from the coast (EC 1626/1994; EC 1967/2006). This study comprises the bottom trawl depths where demersal resources are mainly exploited, targeting European hake (*Merluccius merluccius*), red mullet (*Mullus barbatus*), horned octopus (*Eledone cirrhosa*) and a variety of crustaceans,

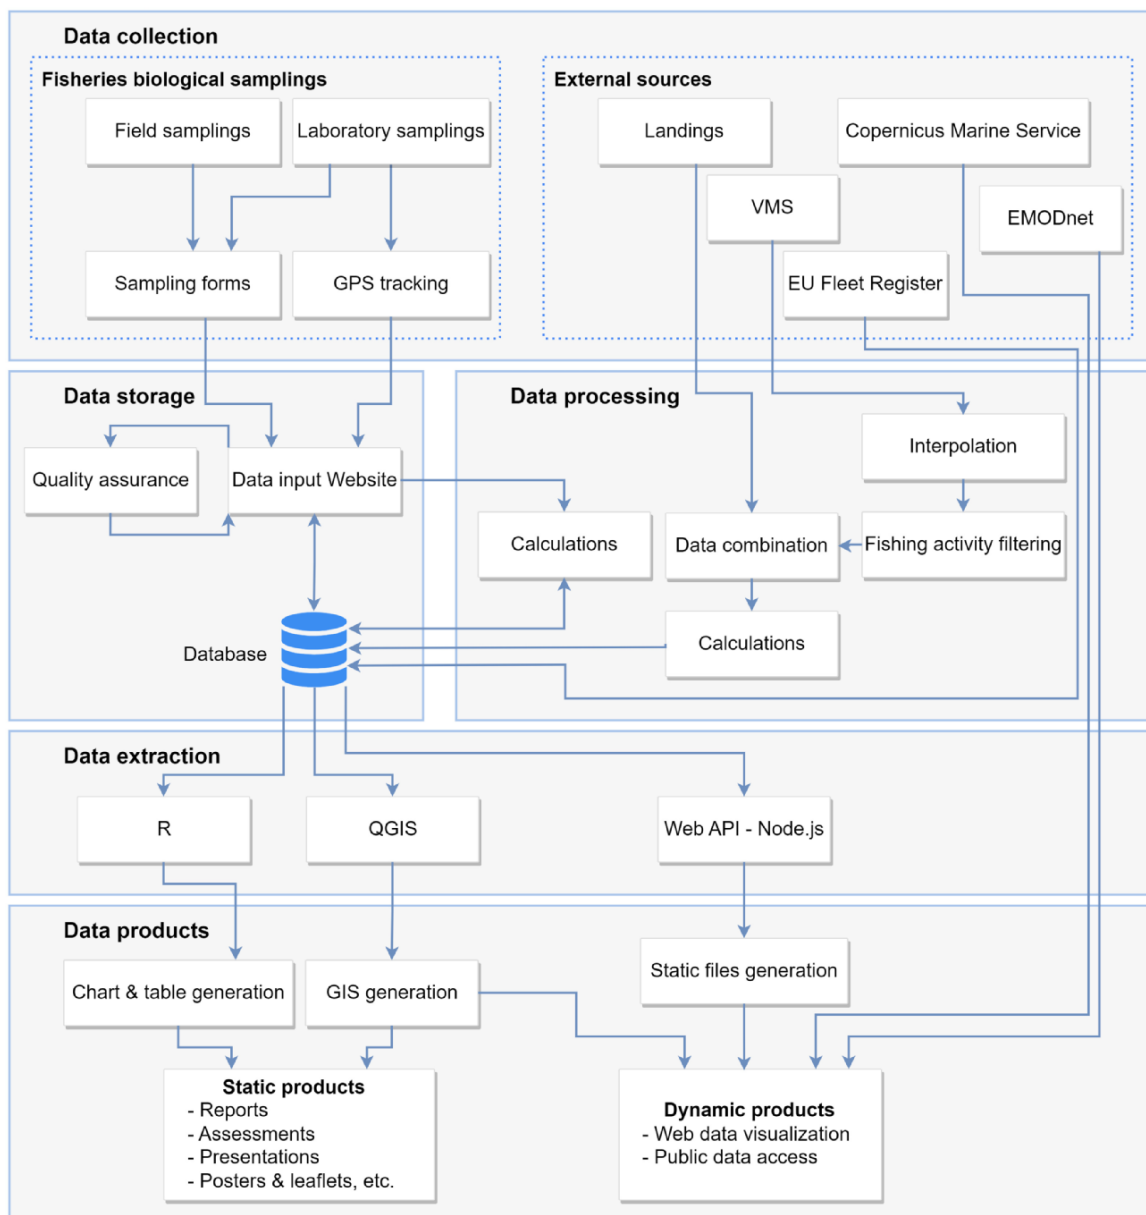

**Figure 2.** Diagram of the data workflow: data collection, processing, storage, extraction and products.

i.e. Norway lobster (*Nephrops norvegicus*), blue and red shrimp (*Aristeus antennatus*), spottail mantis shrimp (*Squilla mantis*), deep-water rose shrimp (*Parapenaeus longirostris*) and caramote prawn (*Penaeus kerathurus*). In Catalonia, the greatest fishing revenue is obtained by the bottom trawl fishery as a result of the high price of some target species. In 2021, this fishery landed 6,603.9 t and generated 55.6 million €, which represent 34.8% and 60.8% of the total fishing catch and revenue, respectively (11).

### Data description and collection

Scientific trawling data collection began in 2019 and it is still ongoing through onboard samplings and posterior laboratory analysis. External fisheries data of the monitoring program (such as daily commercial fishing landings, VMS and EU fleet register) provided by the diverse administrations and other online sources are also collected for data analyses.

ICATMAR's data management systems allow storage of the collected data in a database, automatic data processing, integration with external sources, data sharing and visualization (Figure 2).

Onboard sampling data contain information from daily onboard catches performed at three different depths, one haul at each depth, following the recommendations described in Blanco *et al.* 2023 (12). For each haul, and briefly, the catch is identified at species level and measured. Then, two different subsamples of the catch are brought to the laboratory: (i) a subsample of the target species is used for biological and reproductive studies; (ii) a subsample of the discarded fraction of the catch, including commercial species under the minimum conservation reference size (MCRS), non-commercial species, natural debris and marine litter. This fraction is identified and weighted, and all individuals are measured. Along with the catch composition analysis, all haul positions are registered using a GPS device with point data collected at a frequency of

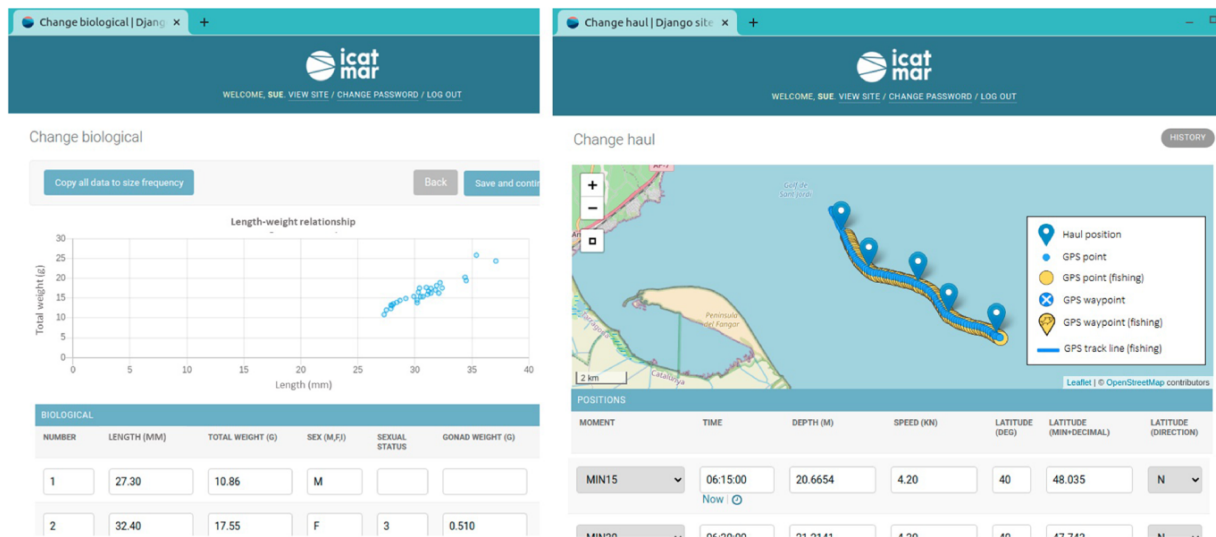

**Figure 3.** Examples of the data input website displaying interactive charts and maps to perform visual validations of the entered data. The scatter chart displays the individuals' lengths and weights to detect possible outliers. The interactive chart is displaying the onboard positions (blue pointers), together with the uploaded GPS points (blue circles) and the GPS points detected as fishing (yellow circles).

1 min. Onboard positions are also manually collected every 15 min from the start to the end of the fishing haul.

The ingestion of onboard and laboratory sampling data is done through an internal data input website. It was developed using Django, an open-source framework based on Python (13). Using the website, the GPS tracks (.gpx files) are uploaded for each haul together with the positions collected manually onboard. Data are automatically transferred from the input website to ICATMAR's database for storage and further processing. The open-source database used is PostgreSQL (14) with PostGIS extension (15).

The database was designed as a relational database. The model of the database was designed by grouping the related fields in indexed tables according to each data concept, relating them with its corresponding cardinality and seeking data redundancy reduction (Supplementary Figure S1). From the data input website, Django's ORM (Object-Relational Mapper) is used to interact with the database. This technique creates a virtual object database, which can be accessed via the programming language.

All data collected go through a validation workflow to ensure high quality in their analysis and publishing. Using the data input website to ingest onboard and laboratory sampling data allows having more control of the data, prevents defects and facilitates validation, data availability and system reliability. This database includes parametrized text fields and the numeric fields with data ranges. Different validations are performed during the data input workflow to trigger warnings and detect errors to prevent defects. Finally, the data are displayed in interactive maps and charts to perform visual validations (Figure 3). The interactive maps use the library Leaflet (16) and the interactive charts use the library Chart.js v2.8 (17). At the end of each season, R scripts are executed to check joint data completeness and perform a general data validation.

There are three main external fisheries data sources that are integrated into ICATMAR's database and linked between them, as detailed below:

- Daily commercial fishing landings provided by the Catalan government (Department of Climate Action, Food and Rural Agenda) since year 2000. The trawling fishing fleet of Catalonia has a daily fishing time limit of 12 h (Real Decreto 1440/1999) and an obligation to land the catches daily. Then, fish sales take place at the auctions upon the arrival of the vessels. All these data are registered and transmitted to the Catalan government daily, providing information on the landing date, fishing vessel, port, species, weight and income.
- Bottom trawling VMS records provided by the General Fisheries Secretariat of the Spanish Ministry of Agriculture, Food and Environment since year 2008. VMS is a satellite-based monitoring system that provides data at regular intervals, at least once every 2 h, specifying the location, course and speed of each trawling vessel (Reg. EC 2371/2002; Reg. EC 1224/2009).
- EU fleet register provided by the European Commission. The EU fleet register provides extra registration information and technical characteristics about the trawling fleet (Reg. EU 2017/218).

### Data processing for standard metrics

Following the DCF guidelines (Reg. EU 2017/1004 and Reg. EU 2019/910), all the collected data are processed to obtain comparable standardized metrics to enable valid estimates that facilitate the fisheries assessment, such as fishing effort, species length distribution or biomass per area ( $\text{km}^2$ ).

Geographical information and fishing gear characteristics are needed to calculate the swept area of the onboard samples from the trawling hauls, used to standardize the abundance and biomass of the different species. The Global Positioning System (GPS) positions are automatically selected and cut by the data input website using the onboard positions to determine the start and end of a haul. The resulting GPS track, together with the trawling net width, is used to calculate the swept area.



The length distribution analysis for the fished species provides valuable insight into the populations' dynamics being a commonly used parameter for the assessment of fisheries. To analyze the length frequencies of each species per each haul, individual sizes are categorized into length classes for each sample (fraction of landed or discarded species). Then, the abundances, expressed as number of individuals per km<sup>2</sup>, for each species ( $x$ ), length class ( $y$ ) and sample ( $z$ ) are calculated and stored in the database following the equation:

$$Abundance_{xyz} \left( \frac{N_{individuals}}{km^2} \right) = \frac{F_{xyz} * SP_z * DP_z}{SD * GW} \quad (1)$$

where  $F$  is the number of individuals for the species  $x$ , length class  $y$  and sample  $z$  within a haul,  $SP$  is the proportion of the subsample,  $DP$  is the proportion of the discard fraction (only used when calculating discards),  $SD$  is the swept distance of a haul and  $GW$  is the width of the gear.

Besides obtaining the length distribution for the main commercial species, it is important to analyze the overall composition of the catch to evaluate the fisheries and their exploited fishing grounds. Thus, to analyze the catch composition from a haul, the weight of the debris and density, expressed as kilograms per kilometre squared, for each species ( $x$ ), category ( $k$ )-landed, discarded, natural debris and marine litter- and sample ( $z$ ) are calculated and stored in the database following the equation:

$$Biomass_{xkz} \left( \frac{kg}{km^2} \right) = \frac{\sum_{i=1}^N (a_x * L_i^{b_x}) * F_{xL_i z} * SP_z * DP_z}{SD * GW} \quad (2)$$

where  $N$  is the number of individuals for the species  $x$ , category  $k$  and sample  $z$  within a haul; and  $L$  is the length of each individual  $i$ , which is transformed to weight using the corresponding length–weight relationship of the species  $x$  ( $a$  and  $b$  parameters). The length–weight relationship is only applied to the individuals measured during the field sampling because they are not weighted, as opposed to those sampled in the laboratory where the weight of all individuals is determined. Thus, the weight from the individuals only measured in length is calculated using the length–weight equation established with the laboratory individuals for each species. The rest of the parameters are explained in Equation. 1. As the debris weight is also standardized to kilograms per kilometre squared, from now on both calculations will be referred to as biomass.

The VMS and landings data are combined to obtain fishing effort maps (kilograms landed) and revenue (€ generated) per kilometre squared, for all the Catalan trawling fleet (Figure 4). All VMS landings are processed automatically via functions and triggering the data workflow.

For data processing, the same protocol described in Sala-Coromina *et al.* (18) is applied. In summary, *VMSbase R* package (19) is used to remove duplicate registers and points on land. Then, the point frequency is increased by interpolating points at 10 min resolution. Ping series corresponding to the same vessel tracks are identified with a track code, unique for each fishing trip (day and vessel). The resulting data are introduced in ICATMAR's database for further analyses. To identify the trawling fishing activity of a vessel, a speed filter is applied to the interpolated VMS data. This filter includes the speed range for fishing and excludes the steaming and inactive moments of the vessel. Moreover, a depth filter is applied

to discard erroneous points located out of the fishing zones. Then, the total fishing time (hours) is calculated for each track.

The fishing VMS positions dataset is then combined with the landings dataset. The variables contained in the landings dataset are weight and revenue per species and fishing trip (day and vessel); therefore, they can be linked to the VMS data through a shared codification of fishing trips (day and vessel). That is, total fishing time, landings and revenues by species of a fishing trip are distributed equally among all fishing positions for the same day and vessel. As a result, a table with each interpolated fishing position with its corresponding fishing time and landings by each commercial species is obtained and stored in ICATMAR's database.

## Data visualization and products

The ICATMAR's database provides service to several data products. In this work, we present three examples of web-based products: length distribution charts per species (Figure 5), catch composition per port or season (Figure 6) and catch geolocation of bottom trawl surveys (Figure 7). For each product, the data visualization is explained in the following paragraphs.

The data extraction from the database is done following the same process for all the products described in the following sections. A node.js server (20) executes SQL queries to the database to extract the required data for each product. This server could make the petitions on demand, but since the database is only updated weekly, the responses of the query are stored as static files in the data products. The web products are developed with Hypertext Markup Language 5, Cascading Style Sheets, JavaScript, and external libraries.

## Length distribution charts

This data product visualizes the length distribution charts for each species based on the bottom trawl sampling data. Several species can be displayed together in the same chart through the web interface (Figure 5).

For the length distribution charts, the SQL queries aggregate and average the abundance metrics explained in the data processing section. In mathematical terms, the abundance (number of individuals per kilometre squared) for each species ( $x$ ) and length classes ( $y$ ) is computed as follows:

$$Aggr. Abundance_{xy} \left( \frac{N_{Individuals}}{km^2} \right) = \frac{1}{N} \sum_{z=1}^{NS} Abundance_{xyz} \quad (3)$$

where  $N$  is the number of hauls and  $NS$  is the number of samples in these hauls. *Abundance* is the number of individuals per kilometre squared for the species  $x$  and length class  $y$  in the sample  $z$ , as explained in the data processing section.

The charts were created using the library Highcharts (21). This library allows a chart to display several graphs at the same time. An interface with a search bar was added to be able to filter by species.

## Catch composition

This web visualization summarizes the biomass for each species of the bottom trawl sampling for each port and season using pie charts (Figure 6).

To obtain the catch composition per port and season, the SQL queries aggregate and average the biomass for each

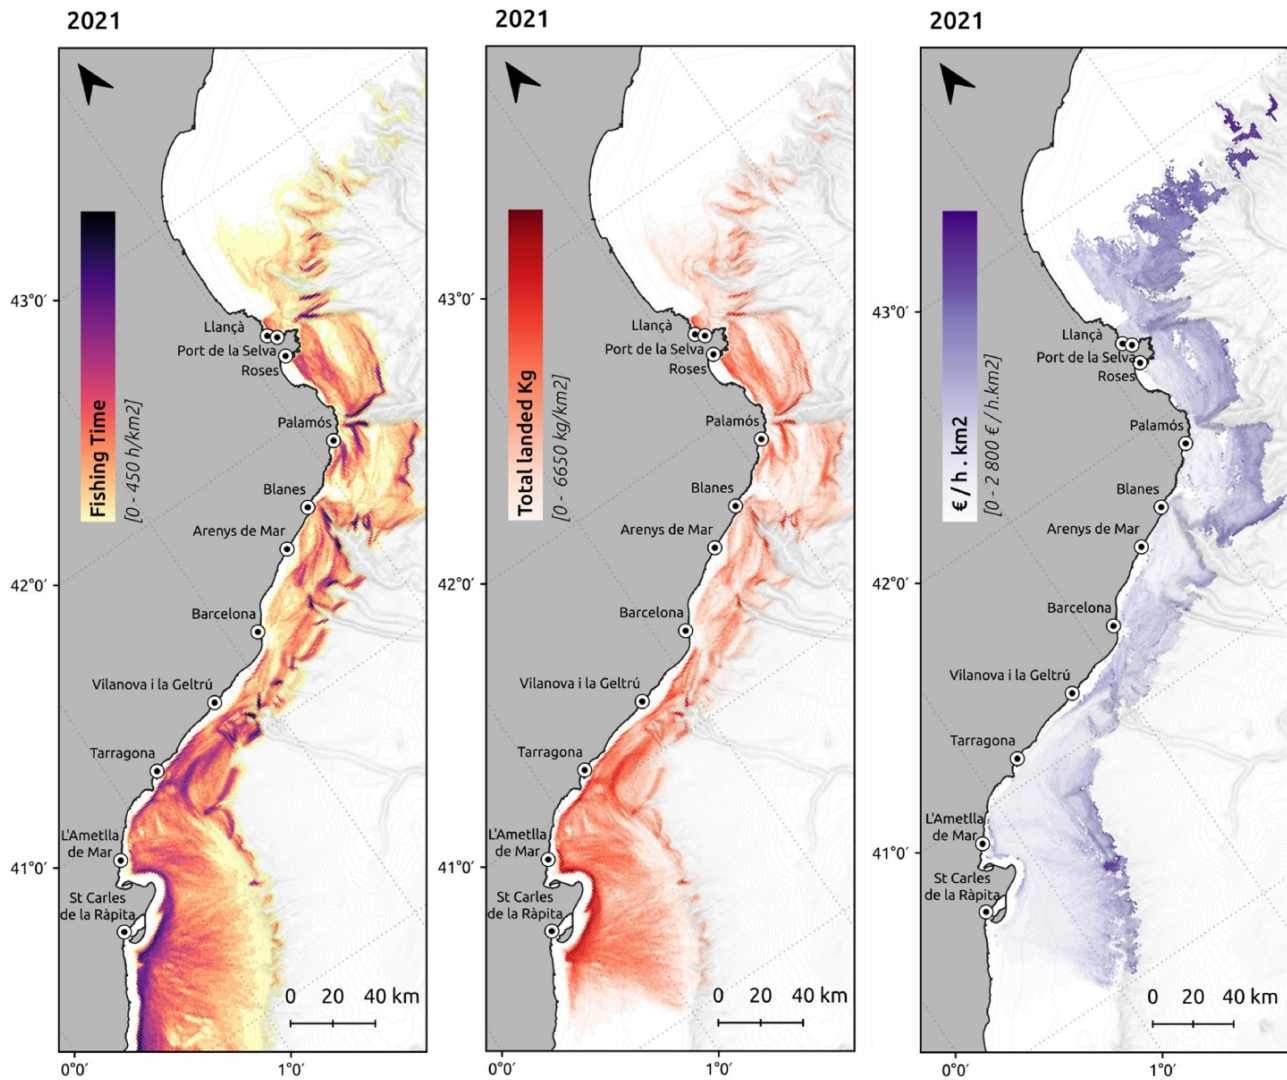

**Figure 4.** Spatial distribution of the fishing effort ( $\text{h}/\text{km}^2$ ), landings ( $\text{kg}/\text{km}^2$ ) and revenues per unit of effort ( $\text{€}/\text{h.km}^2$ ) produced by the bottom trawling fishing fleet in 2021.

species. In mathematical terms, the species biomass ( $\text{kg per km}^2$ ) for each species ( $x$ ) and category ( $y$ ) is computed as follows:

$$\text{Aggr. Biomass}_{xk} \left( \frac{\text{kg}}{\text{km}^2} \right) = \frac{1}{N} \sum_{z=1}^{NS} \text{Biomass}_{xkz} \quad (4)$$

where  $N$  is the number of hauls and  $NS$  is the number of samples in these hauls.  $\text{Biomass}$  is the weight in  $\text{kg per km}^2$  of the species  $x$  and category  $k$  in the sample  $z$ , as explained in the data processing section. The query selects the hauls that belong to a port or a season, depending on the type of product.

The pie charts use the library of D3 (22) and are based on the zoomable sunburst pie charts (23). The interactive pie charts have different levels, allowing the user to navigate through them and hover over the partitions to see the aggregated biomass at each level. The web interface allows to compare pie charts, side by side, at species level, i.e. plotting the biomass distribution for certain species. In detail, the port pie charts have four different levels: area (north, central, south), port (a total of nine ports), category (landed, discarded, natural debris, and marine litter)

and species biomass. Similarly, the seasonal pie charts have four levels: year, season (spring, summer, autumn, winter), category and species biomass. The biomass is aggregated at the highest levels, e.g. the total biomass of an area/port or year/season including all categories. The user can filter the pie charts by species. This feature allows the user to see the distribution of determined species over different areas or seasons. Data can be downloaded for each pie chart.

#### Catch geolocation

This data product is an interactive map that joins the sampled hauls' catch composition with the geographic location, time and specific weather and sea conditions. The hauls' catch composition can be seen together with the trawling fleet activity through fishing effort and landings distribution maps.

The base map shows the GPS tracks for a sampling haul together with geographical and bathymetrical information. Moreover, a side panel displays information on the haul's catch composition and the sea conditions at the time. Additional layers can be added to the map such as fishing effort,

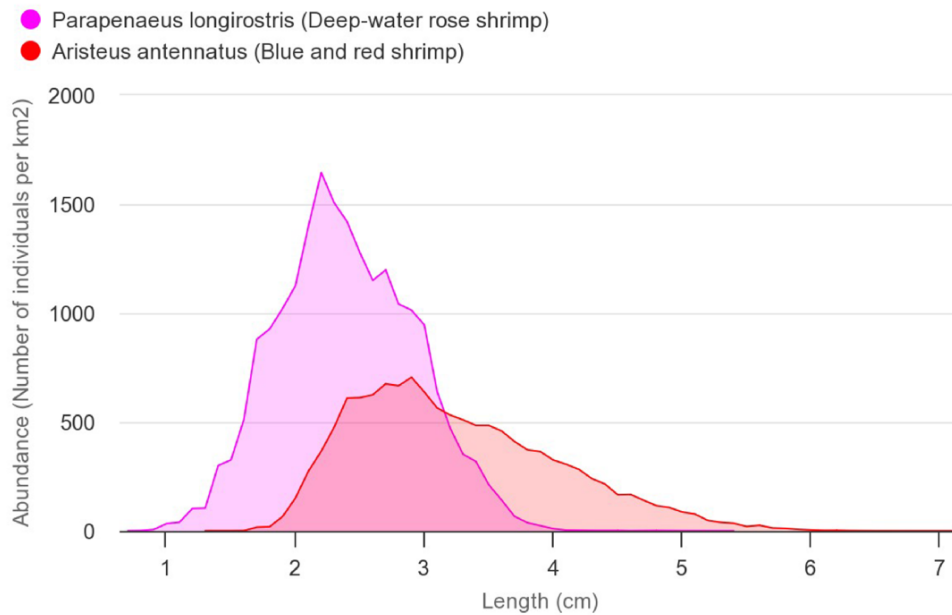

**Figure 5.** Comparison of the length-frequency distributions of blue and red shrimp (*A. antennatus*—red) and deep-water rose shrimp (*P. longirostris*—pink). The abundances on the chart are the average of all areas and years (number of individuals/km<sup>2</sup>).

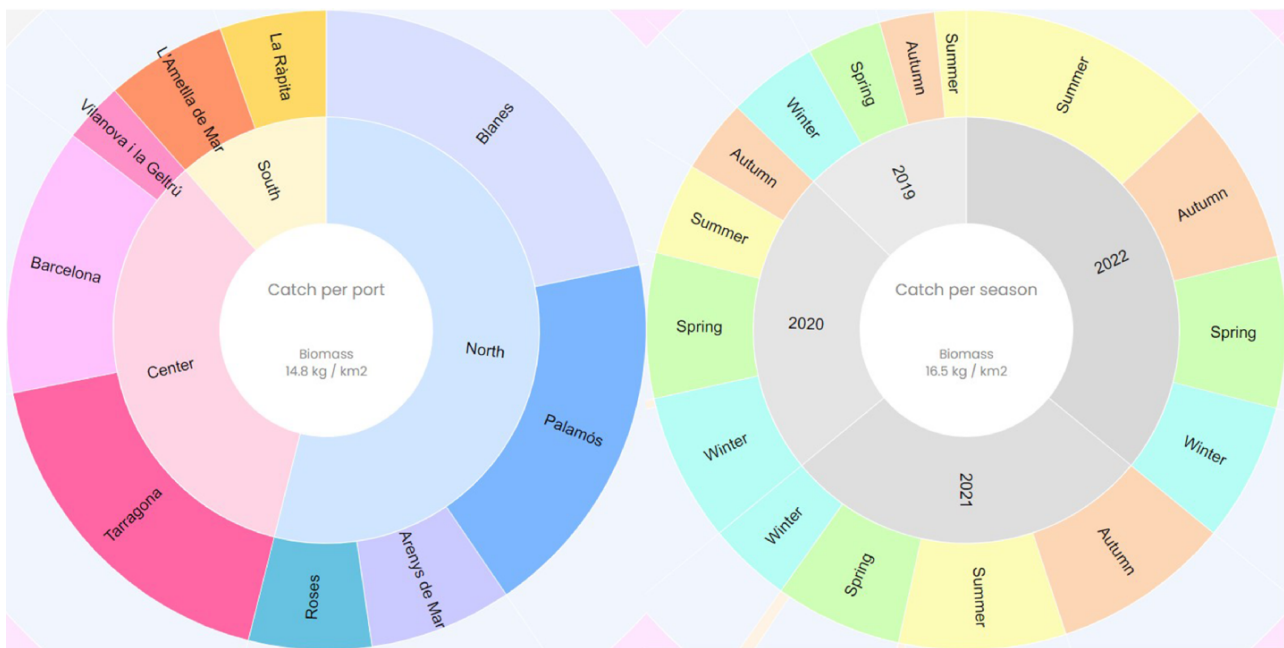

**Figure 6.** Catch composition per port and season of the deep-water rose shrimp (*P. longirostris*). The value of the central circle is the average of the species' biomass per port or season (kg/km<sup>2</sup>).

seabed habitat and sea conditions (data models and observations of sea temperature, salinity, chlorophyll, etc.). On the bottom of the application, the dates of the sampled hauls are shown on an interactive calendar (Figure 7).

For each haul, the following information is extracted from the database: catch composition, GPS track, average depth, fishing ground characteristics and duration. The queries to the database for this data product have a similar structure as in the previous product named 'catch composition'. The main difference is that the biomass data are aggregated per haul.

Maps of fishing effort, biomass and revenue per area (kilometre squared) are added to the visualization, using data from VMS and landings, as explained in the data processing section. These maps are stored as images and used in the interactive web application.

Data about the sea conditions are requested on the fly from the E.U. Copernicus Marine Service Information (CMEMS) through Web Map Service (WMS). These queries provide data from models and satellite observations about sea surface temperature, sea bottom temperature, sea surface temperature







**Table 1.** Bottom trawling sampling statistics from 2019 to 2022 with 84% of the specimens identified at the species level. SE means Standard Error

| Parameters                    | 2019    | 2020    | 2021    | 2022    | Total     | Annual average $\pm$ SE |
|-------------------------------|---------|---------|---------|---------|-----------|-------------------------|
| Number of hauls               | 116     | 89      | 102     | 99      | 406       | 102 $\pm$ 6             |
| Trip duration (h)             | 466     | 328     | 349     | 354     | 1497      | 374 $\pm$ 31            |
| Swept distance (km)           | 936.0   | 699.1   | 775.5   | 696.8   | 3,107.4   | 776.9 $\pm$ 56.1        |
| Swept area (km <sup>2</sup> ) | 19.9    | 14.7    | 16.4    | 15.6    | 66.9      | 16.7 $\pm$ 1.1          |
| Number of sampled specimens   | 317 889 | 245 858 | 299 949 | 236 736 | 1 100 432 | 275 108 $\pm$ 19 948    |
| Sampled catch (t)             | 7.9     | 4.8     | 5.7     | 6.1     | 24.6      | 6.1 $\pm$ 0.6           |
| Number of measured specimens  | 74 527  | 50 853  | 60 780  | 60 758  | 246 918   | 61 730 $\pm$ 4864       |
| Number of dissected specimens | 10 101  | 7619    | 8275    | 10 339  | 36 334    | 9084 $\pm$ 671          |
| Different identified taxa     | 435     | 364     | 385     | 364     | 535       | 387 $\pm$ 17            |

## Use cases

In this section, two use cases are described. The use cases are examples of specific scientific questions that are of current interest to show the potential of the system presented here. The first use case is related to the appearance of a shrimp species on the Catalan coast, whereas the second one shows the impact of a storm in the marine litter caught with bottom trawls.

### Warming of the Mediterranean Sea and *Parapenaeus longirostris*

The water temperature of the Mediterranean Sea has been increasing over the past years (35), a fact that is suspected to alter the habitats and distributions of certain species (36, 37). The blue and red shrimp (*Aristeus antennatus*) is extensively commercialized being a main target species for the fishing sector. In the recent years, the deep-water rose shrimp (*Parapenaeus longirostris*) has increased its abundance and presence becoming one of the top commercial species of the study area, probably favored by warmer Mediterranean waters (38). To understand and analyze the presence of both shrimp species and any potential interaction between the species, several questions need to be answered. The system presented in this work can contribute answering some of these questions (Figure 2).

Regarding the sampling data, the catch composition per port shows that the deep-water rose shrimp is mostly fished in the northern and central area of the Catalan coast. The fact that its biomass is much lower in the south, might be related to the shallow depths of the wide continental shelf of the Ebre Delta, which covers most of the southern trawling area. The catch composition per season shows that the deep-water rose shrimp is fished all year round, and the fished biomass increases yearly (Figure 6).

The blue and red shrimp follows a similar distribution in terms of geographic area (Supplementary Figure S2), along with a similar biomass (16.6 kg/km<sup>2</sup>) than the deep-water rose shrimp (14.8 kg/km<sup>2</sup>). Although the catch per port is similar for both species, the sampled hauls of the catch geolocation show that these two species are caught in different locations and do not share the same habitat (Supplementary Figure S3): the deep-water rose shrimp is mainly found in the deeper continental shelf and the upper slope, at depths between 100–400 m, whereas the red and blue shrimp is mainly found in the lower slope (>450 m depth). Nevertheless, when comparing the catch composition per season between 2019 and 2022, it is observed that the deep-water rose shrimp has overtaken the blue and red shrimp in terms of biomass, becoming one of

the most important crustacean catches in the Catalan coast (Supplementary Figure S4).

Almost all individuals caught for both species are commercialized and never discarded (Supplementary Figure S5 as an example). The length distribution chart shows that deep-water rose shrimp individuals <2 cm are commercialized, when they should be discarded because their minimum conservation reference size (MCRS) in the Mediterranean is 2 cm (Figure 5). This is an indication that MCRS management measure for the deep-water rose shrimp is not fully implemented by the fishing fleet.

### Storm Gloria and marine litter in the catch

Between the 20th and 23rd of January 2020, the storm Gloria hit the Catalan coast with waves over 8 m high and rainfall up to 400 mm in a single day, resulting in flooding and significant changes along the Catalan coastline (39). This type of events tends to increase the amount of marine litter in the sea, as mismanaged waste is flushed directly to the sea along with water that has not gone through wastewater treatment plans because of capacity limitations (40). Then, the accidental catch of marine litter may be more abundant after extreme weather events, increasing the probability to damage fishing gears, and even the vessel's propellers (41, 42). The data collected and its visualization allows the visual analyses of benthic marine litter along the Catalan coast and the understanding of how extreme weather events may affect its presence, abundance and composition. The visualization 'catch composition' per season shows that, in spring 2020, the marine litter found was almost double the marine litter found in other seasons (Supplementary Figures S6 and S7). That spring, about 60% of the marine litter fished was disposable wet wipes, which compared to springs from other years was unusual. Marine litter data may provide understanding on waste mismanagement and may be used to implement best management strategies both on land and in the sea (43).

The product catch geolocation allows tracking the accidental catch of marine litter after the storm to understand the evolution of the marine waste on fishing grounds. Inside the application, one can select the hauls after the storm Gloria and compare them with the hauls before and after, in different areas and depths. Barcelona is one of the largest cities in Europe (1.6 million of people; Eurostat) and it is limited by two rivers (Llobregat and Besós). There, 16 hauls were done at an approximate distance of 7 km from the coast and at a depth of around 100 m from 2019 to 2022. The data showed an increase in marine litter in the summer of 2020, just 6 months after the storm. The marine litter collected on that area reached a maximum of 365 kg/km<sup>2</sup> in a specific haul,

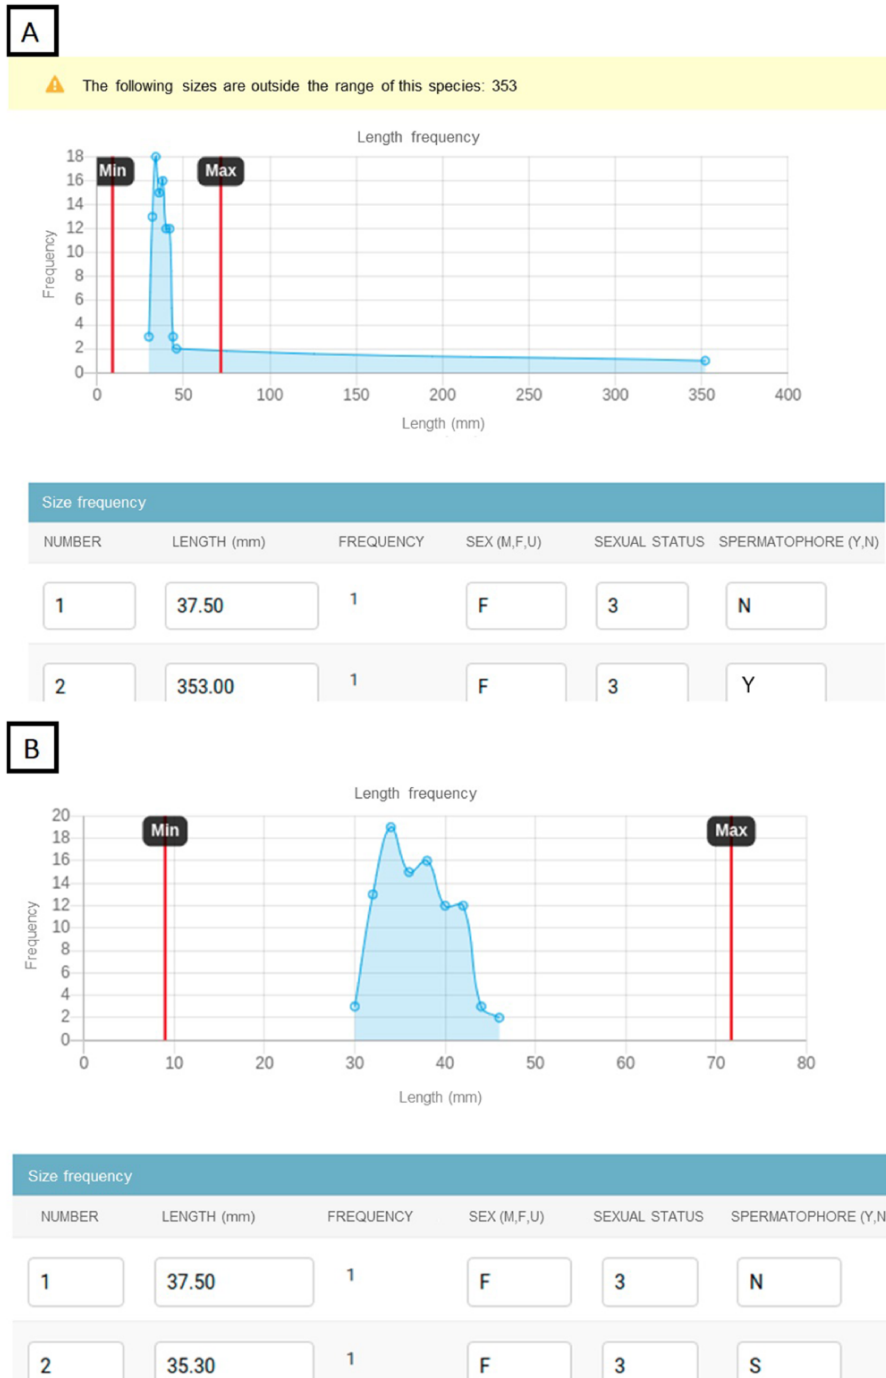

**Figure 8.** Example of the data input website to prevent incorrect data. The website displays a line chart with the length frequency and species' length ranges. If some lengths are out of the range, they can be detected in the length frequency chart and the website triggers a warning with the lengths that need to be checked. Chart showing the lengths out of range with a warning detecting the outliers (A). Chart showing the fixed lengths that fall within the range values (B).

whereas the months before and after (~1 year and a half) the storm, these were around 121 kg/km<sup>2</sup>. At >10 km off the coast and at depths >300 m, other hauls (a total of 25) did not show litter biomasses >48 kg/km<sup>2</sup>, probably indicating that the areas adjacent to the coast are more affected by storms and heavy rains.

### Discussion

This work presents methods for all the process from data collection to web visualization from bottom trawl surveys for best fisheries management practices in the NW Mediterranean Sea. The two use cases presented to illustrate the usability of the data and their visualizations exemplify how the interface

can be used for scientific analysis, which could lead to science-based governance. Moreover, the addition of external data such VMS or daily landings makes the system more robust (44) and offers a great potential for a variety of users and goals. The main goal of the data management systems is to be used not only for governance and science but also for the industry, such as the fishing sector, and the society at large. This goal is aligned with the FAIR principles to give access to several stakeholders (7), and follows the Ocean Decade Challenge 9—deliver skills, knowledge and technology to give ‘access to data, information, knowledge and technology across all aspects of ocean science and for all stakeholders’ (45). In addition, the fact that the technologies used for the entire system and the developed web visualization are open-source ensures replicability and contributes to a more robust and reliable scientific landscape (46).

Fisheries management should be based on scientific advice provided by onboard observers and port samplings data, among other information (47–49). However, the most difficult obstacle to efficient monitoring and assessment of marine ecosystems is to obtain records of adequate quantity and quality for a region, period and taxonomic group of interest (50–52). Fishery databases, such as the Clodia database in the Adriatic Sea (53), rely on landed or target species rather than ocean monitoring. This is a problem for fisheries science and ecosystem-based management because environmental traits are important to understand fish stocks (48, 54).

The data presented in ICATMAR’s database and their web visualization is provided by an intense monitoring program, in combination with external fisheries data, to offer a comprehensive and detailed visualization for fisheries’ management. Moreover, as all data pre-processing is routinely done and stored, scientific or administration questions can be quickly answered. These data curation improvement efforts are essential to publish high quality and easily accessible data that can help make better management decisions, similar to what other global marine information systems (e.g. OBIS, Ocean Biodiversity Information System) are implementing elsewhere (55).

Open-access scientific data are still limited. For example, more than half of the studies published in journals such as *Nature* or *Science* over the past 10 years still lack key data that would allow for re-analysis or meta-analysis (56). Research and management in natural resource science increasingly relies on very large datasets gathered from multiple sources (57), such as the web visualization presented in this study. Web visualization is a way to share science globally while lowering the costs of data collection, which may be costly and time consuming. Moreover, web visualization facilitates the re-analyses of the data, confirms results, spots errors and gains understanding (58) on fisheries science.

As far as the authors know, there are few open-data portals displaying similar information. For example, the Irish Groundfish Survey, which is part of the Ireland’s data collection scheme (44), shows similar information for 19 target species (<https://shiny.marine.ie/igfs/>). However, as opposed to the web visualization presented here, the data do not integrate information on discards or marine litter and it only shows the information per species, missing the holistic perspective of the ecosystem approach that fisheries management should seek (48, 54).

The fishing industry is one of the most interested stakeholders to get and understand scientific fisheries data. This understanding is of great importance when moving towards co-management strategies, where the different stakeholders involved need to be engaged at each stage of the process (47). In order to achieve fisheries sustainability in biological, social and economic aspects, co-management encourages direct users, governments and other actors to jointly manage the resources of the fisheries (59). In the NW Mediterranean, Spain promoted the Plan Castelló (1961–1966), an officially recognized co-management system that demonstrated a recovery of the fishing stocks and an increase in the catch for the main commercial species (60). Currently, co-management has gained importance globally on the premise that fishers’ participation in resource regimes increases compliance, reduces transaction costs and raises authority over decisions (61). To better implement co-management strategies, the web visualization here presented may be used as a tool to facilitate comprehension of the scientific data to the fishing industry easing the dialogue between science and fisheries.

Several challenges from the Ocean Decade highlight the importance for society to understand and value the ocean and how it relates to sustainability development and human well-being (45). In fact, the Ocean Decade has six different societal outcomes, including safety, sustainability and prediction among others, which require actions by the society, administrations, or by key stakeholders to be fully achieved (62). The need to connect society and ocean research (63) may be ameliorated by using formal and informal educational strategies, as well as tools for raising awareness (64). Then, the web visualization may be used not only as an easily accessible and interactive tool for awareness but also, it can be helpful for educational goals. Therefore, the web visualization can be used as an educational tool to engage students in marine and fisheries sciences because teaching must involve students in real-world situations, providing them the chance to develop theories and evaluate those theories based on empirical data (65). So far, the bottom trawl sampling data are collected in ICATMAR’s database, processed and visualized, but to reach other relevant stakeholders, small-scale fisheries, purse seine and recreational fishing samplings will be added into the data management systems as future improvements.

Fisheries databases include high volumes of data, but static reports are limited to targeted species and specific metrics. Thus, the end-to-end system, from data collection to web visualization, presented in this study allows all stakeholders to navigate the data through a user-friendly tool to gain engagement and promote ocean sustainability. The visualizations proposed here are the first step towards an open data visualization application of fishing catches on the Catalan coast.

## Supplementary Material

Supplementary material is available at *Database* online.

## Conflict of interest

None declared.



## Funding

This work was supported by the *Institut Català de Recerca per a la Governança del Mar* (ICATMAR) and financed by European Maritime and Fisheries Fund (EMFF) and the Catalan General Directorate of Marine Policy and Sustainable Fisheries by projects PESCAT [grant number ARP029/18/00003] and CGCAT [grant number ARP140/20/000006]. The web visualization was financed by the Generalitat de Catalunya and by the European Regional Development Fund (ERDF) through the project *BlueNetCat*.

## Acknowledgements

We are very thankful to all fishers for their support throughout the ICATMAR program. We also thank the ICATMAR team for their hard work in the data collection.

## References

- Srinivasan,U.T., Watson,R. and Sumaila,U.R. (2012) Global fisheries losses at the exclusive economic zone level, 1950 to present. *Marine Policy*, 36, 544–549.
- Pauly,D. and Zeller,D. (2017) Comments on FAOs State of World Fisheries and Aquaculture (SOFIA 2016). *Marine Policy*, 77, 176–181.
- Hilborn,R., Amoroso,R.O., Anderson,C.M. *et al.* (2020) Effective fisheries management instrumental in improving fish stock status. *Pnas*, 117, 2218–2224.
- Leblond,E., Fabienne,D., Patrick,B. *et al.* (2008) The fisheries information system of ifremer: a multidisciplinary monitoring network and an integrated approach for the assessment of French fisheries, including small-scale fisheries. In *ICES 2008 Annual Science Conference*. Halifax, Canada.
- Boenish,R., Willard,D., Kritzer,J.P. *et al.* (2020) Fisheries monitoring: perspectives from the United States. *Aquacult. Fish.*, 5, 131–138.
- Bradley,D., Merrifield,M., Miller,K.M. *et al.* (2019) Opportunities to improve fisheries management through innovative technology and advanced data systems. *Fish Fish.*, 20, 564–583.
- Wilkinson,M.D., Dumontier,M., Aalbersberg,I.J. *et al.* (2016) The FAIR guiding principles for scientific data management and stewardship. *Scientific Data*, 3, 160018.
- Anderson,P.J. and Piatt,J.F. (1999) Community reorganization in the Gulf of Alaska following ocean climate regime shift. *Mar. Ecol. Prog. Ser.*, 189, 117–123.
- Szuwalski,C.S. and Hollowed,A.B. (2016) Climate change and non-stationary population processes in fisheries management. *ICES J. Environ. Sci.*, 73, 1297–1305.
- Wilderbuer,T.K., Hollowed,A.B., Ingraham,W.J. *et al.* (2002) Flatfish recruitment response to decadal climatic variability and ocean conditions in the eastern Bering Sea. *Prog. Oceanogr.*, 55, 235–247.
- ICATMAR. (2022) Institut Català de Recerca per a la Governança del Mar (ICATMAR). Evolució de les captures i els preus de venda del sector pesquer a Catalunya: Comparativa 2020-2021. ICATMAR, 22-03, pp. 120, Barcelona.
- Blanco,M., Nos,D., Lombarte,A. *et al.* (2023) Characterization of discards along a wide bathymetric range from a trawl fishery in the NW Mediterranean. *Fish. Res.*, 258, 106552.
- Django. (2005) Django, the web framework for perfectionists with deadlines. Kirby C, Sonmez CU, McLaughlin K (Edited by.) *et al.* Django Software Foundation.
- PostgreSQL (1996) PostgreSQL: the world's most advanced open source relational database. In The PostgreSQL Global Development Group.
- PostGIS. (2015) PostGIS. Open Source Geospatial Foundation.
- Leaflet. (2010) Leaflet, an open-source JavaScript library for mobile-friendly interactive maps. Edited by Agafonkin V.
- Chart.js. (2013) Chart.js, simple yet flexible JavaScript charting library for the modern web. Edited by Downie N.
- Sala-Coromina,J., García,J.A., Martín,P. *et al.* (2021) European hake (*Merluccius merluccius*, Linnaeus 1758) spillover analysis using VMS and landings data in a no-take zone in the northern Catalan coast (NW Mediterranean). *Fish. Res.*, 237, 105870.
- Russo,T., D'Andrea,L., Parisi,A. *et al.* (2014) VMSbase: an R-package for VMS and logbook data management and analysis in fisheries ecology. *PLoS ONE*, 9, e100195.
- Tilkov,S. and Vinoski,S. (2010) Node.js: Using JavaScript to Build High-Performance Network Programs. *IEEE Internet Comput.*, 14, 80–83.
- Highcharts. (2009) *Highcharts, Simply Visualize*. VIK I SOGN. Highsoft AS, Norway.
- Ogievetsky,V., Heer,J. and Bostock,J. (2011) D3 data-driven documents. *IEEE Trans. Vis. Comput. Graph.*, 17, 2301–2309.
- D3.js (2011) D3, bring your data to life. Edited by Bostock M, Meckfessel M. Observable, Inc.
- Buongiorno Nardelli,B., Tronconi,C., Pisano,A. *et al.* (2013) High and ultra-high resolution processing of satellite sea surface temperature data over Southern European Seas in the framework of MyOcean project. *Remote Sens. Environ.*, 129, 1–16.
- Clementi,E., Aydogdu,A., Goglio,A.C. *et al.* (2021) *Mediterranean Sea Physical Analysis and Forecast (CMEMS MED-Currents, EAS6 System) (Version 1) [Data Set]*. Copernicus Monitoring Environment Marine Service (CMEMS).
- Escudier,R., Clementi,E., Cipollone,A. *et al.* (2021) A high resolution reanalysis for the Mediterranean Sea. *Front. Earth Sci.*, 9, 702285.
- Escudier,R., Clementi,E., Omar,M. *et al.* (2020) Mediterranean sea physical reanalysis (CMEMS MED-Currents) (Version 1) Data set. *Copernicus Monit. Environ. Mar. Serv. (CMEMS)*.
- Nigam,T., Escudier,R., Pistoia,J. *et al.* (2021) *Mediterranean Sea physical reanalysis INTERIM (CMEMS MED-Currents, E3R1i system) (Version 1) Data set*. Copernicus Monit. Environ. Mar. Serv. (CMEMS).
- Feudale,L., Bolzon,G., Lazzari,P. *et al.* (2021) *Mediterranean Sea Biogeochemical Analysis and Forecast (CMEMS MED-Biogeochemistry, MedBFM3 System) (Version 1) [Data Set]*. Copernicus Monit. Environ. Mar. Serv. (CMEMS).
- Giesen,R., Stoffelen,A. and Verhoef,A. (2022) Global ocean hourly reprocessed sea surface wind and stress from scatterometer and model. *Copernicus Monit. Environ. Mar. Serv. (CMEMS)*.
- Korres,G., Ravdas,M., Zacharioudaki,A. *et al.* (2021) *Mediterranean Sea Waves Analysis and Forecast (CMEMS MED-Waves, MedWAM3 System) (Version 1) [Data Set]*. Copernicus Monit. Environ. Mar. Serv. (CMEMS).
- Vasquez,M., Allen,H., Manca,E. *et al.* (2021) EUSeaMap 2021. A European broad-scale seabed habitat map. D1.13 EASME/EMFF/2018/1.3.1.8/Lot2/SI2.810241– EMODnet Thematic Lot n° 2 – Seabed Habitats EUSeaMap 2021. *Technical Report*.
- Vuejs (2014) Vuejs, the progressive JavaScript framework. Edited by You E.
- OpenLayers (2006) OpenLayers, a high-performance, feature-packed library for all your mapping needs. In MetaCarta Labs.
- Lionello,P. and Scarascia,L. (2018) The relation between climate change in the Mediterranean region and global warming. *Reg. Environ. Change*, 18, 1481–1493.
- Anadón,R.A., Danovaro,R., Dippner,J.W. *et al.* (2007) Impacts of climate change on the European marine and coastal environment. European Science Foundation.

37. MedECC. (2020) Climate and environmental change in the Mediterranean basin – Current situation and risks for the future. First Mediterranean assessment report. Union for the Mediterranean, Plan Bleu, UNEP/MAP: Marseille, France, pp. 1–632.
38. Quattrocchi,F., Fiorentino,F., Lauria,V. *et al.* (2020) The increasing temperature as driving force for spatial distribution patterns of *Parapenaeus longirostris* (Lucas 1846) in the Strait of Sicily (Central Mediterranean Sea). *J. Sea Res.*, **158**, 101871.
39. De Alfonso M., Lin-Ye,J., García-Valdecasas,J.M. *et al.* (2021) Storm Gloria: sea state evolution based on in situ measurements and modeled data and its impact on extreme values. *Front. Mar. Sci.*, **8**, 646873.
40. Bergmann,M., Gutow,L. and Klages,M. (2015) *Marine Anthropogenic Litter*. Springer International Publishing: United States.
41. Galgani,F., Hanke,G., Werner,S. *et al.* (2013) Marine litter within the European Marine strategy framework directive. *ICES J. Environ. Sci.*, **70**, 1055–1064.
42. Nash,A.D. (1992) Impacts of marine debris on subsistence fishermen an exploratory. *Mar. Pollut. Bull.*, **24**, 150–156.
43. Ronchi,F., Galgani,F., Binda,F. *et al.* (2019) Fishing for litter in the Adriatic-Ionian macroregion (Mediterranean Sea): strengths, weaknesses, opportunities and threats. *Marine Policy*, **100**, 226–237.
44. Stokes,D.H.G., O’Hea,B. *et al.* (2014) Irish groundfish survey cruise report, Sept. 24th – Dec. 17th. Galway: Marine Institute; pp. 1–35.
45. Bender,M., Bustamante,R. and Leonard,K. (2022) Living in relationship with the Ocean to transform governance in the UN Ocean Decade. *PLoS Biol.*, **20**, e3001828.
46. Lowndes,J.S.S., Best,B.D., Scarborough,C. *et al.* (2017) Our path to better science in less time using open data science tools. *Nat. Ecol. Evol.*, **1**, 0160.
47. Goethel,D.R., Omori,K.L., Punt,A.E. *et al.* (2023) Oceans of plenty? Challenges, advancements, and future directions for the provision of evidence-based fisheries management advice. *Rev. Fish Biol. Fish.*, **33**, 375–410.
48. Wilson,D.C. (2009) *The Paradoxes of Transparency. Science and the Ecosystem Approach to Fisheries Management in Europe*. Amsterdam University Press, Amsterdam.
49. Gilman,E., Weijerman,M. and Suuronen,P. (2017) Ecological data from observer programs underpin ecosystem-based fisheries management. *ICES J. Environ. Sci.*, **74**, 1481–1495.
50. Ball-Damerow,J.E., Brenskelle,L., Barve,N. *et al.* (2019) Research applications of primary biodiversity databases in the digital age. *PLOS ONE*, **14**, e0215794.
51. Maldonado,C., Molina,C.I., Zizka,A. *et al.* (2015) Estimating species diversity and distribution in the era of big data: to what extent can we trust public databases? *Global Ecol. Biogeogr.*, **24**, 973–984.
52. Ramírez,F., Sbragaglia,V., Soacha,K. *et al.* (2022) Challenges for marine ecological assessments: completeness of findable, accessible, interoperable, and reusable biodiversity data in European seas. *Front. Mar. Sci.*, **8**, 2038.
53. Mazzoldi,C., Sambo,A. and Riginella,E. (2014) The Clodia database: a long time series of fishery data from the Adriatic Sea. *Scientific Data*, **1**, 140018.
54. Pikitch,E.K., Santora,C., Babcock,E.A. *et al.* (2004) Ecosystem-based fishery management. *Science*, **305**, 346–348.
55. Vandepitte,L., Bosch,S., Tyberghein,L. *et al.* (2015) Fishing for data and sorting the catch: assessing the data quality, completeness and fitness for use of data in marine biogeographic databases. *Database*, **2015**, 1–14.
56. Tederloo,L., Küngas,R., Oras,E. *et al.* (2021) Data sharing practices and data availability upon request differ across scientific disciplines. *Scientific Data*, **8**, 192.
57. Volk,C.J., Lucero,Y. and Barnas,K. (2014) Why is data sharing in collaborative natural resource efforts so hard and what can we do to improve it? *Environ Manage*, **53**, 883–893.
58. Huntington,H.P., Archer,E., Ashley,W.S. *et al.* (2020) Data availability principles and practice. *Weather Clim. Soc.*, **12**, 647–649.
59. D’Armengol L., Prieto Castillo,M., Ruiz-Mallén,I. *et al.* (2018) A systematic review of co-managed small-scale fisheries: social diversity and adaptive management improve outcomes. *Global Environ. Change*, **52**, 212–225.
60. Lostado,R., Del Río V. and Vivas,D. (1999). The Castellón trawling project (1961–1966): teachings for a sustainable fisheries management. COPEMED.
61. Stratoudakis,Y. (2021) Legitimacy objects, agents, and evaluators: A framing to strengthen planning and performance of fisheries co-management. *Environ. Sci. Policy*, **116**, 230–238.
62. Ryabinin,V., Barbière,J., Haugan,P. *et al.* (2019) The UN decade of ocean Science for sustainable development. *Front. Mar. Sci.*, **6**, 470.
63. Mackinson,S., Wilson,D.C., Galiay,P. *et al.* (2011) Engaging stakeholders in fisheries and marine research. *Marine Policy*, **35**, 18–24.
64. Worm,B., Elliff,C., Graça Fonseca,J. *et al.* (2021) Making ocean literacy inclusive and accessible. *Ethics Sci. Environ. Polit.*, **21**, 1–9.
65. Osborne,J. (2014) Teaching scientific practices: meeting the challenge of change. *J Sci Teacher Educ*, **25**, 177–196.
